# Supplementary material for: Sequence Similarity Network Reveals Common Ancestry of Multidomain Proteins
Source: PLOS journal article supplement (doi:10.1371/journal.pcbi.1000063), 2008-05-16
Supplement: S3 (10.1371/journal.pcbi.1000063.s003) [file journal.pcbi.1000063.s003]

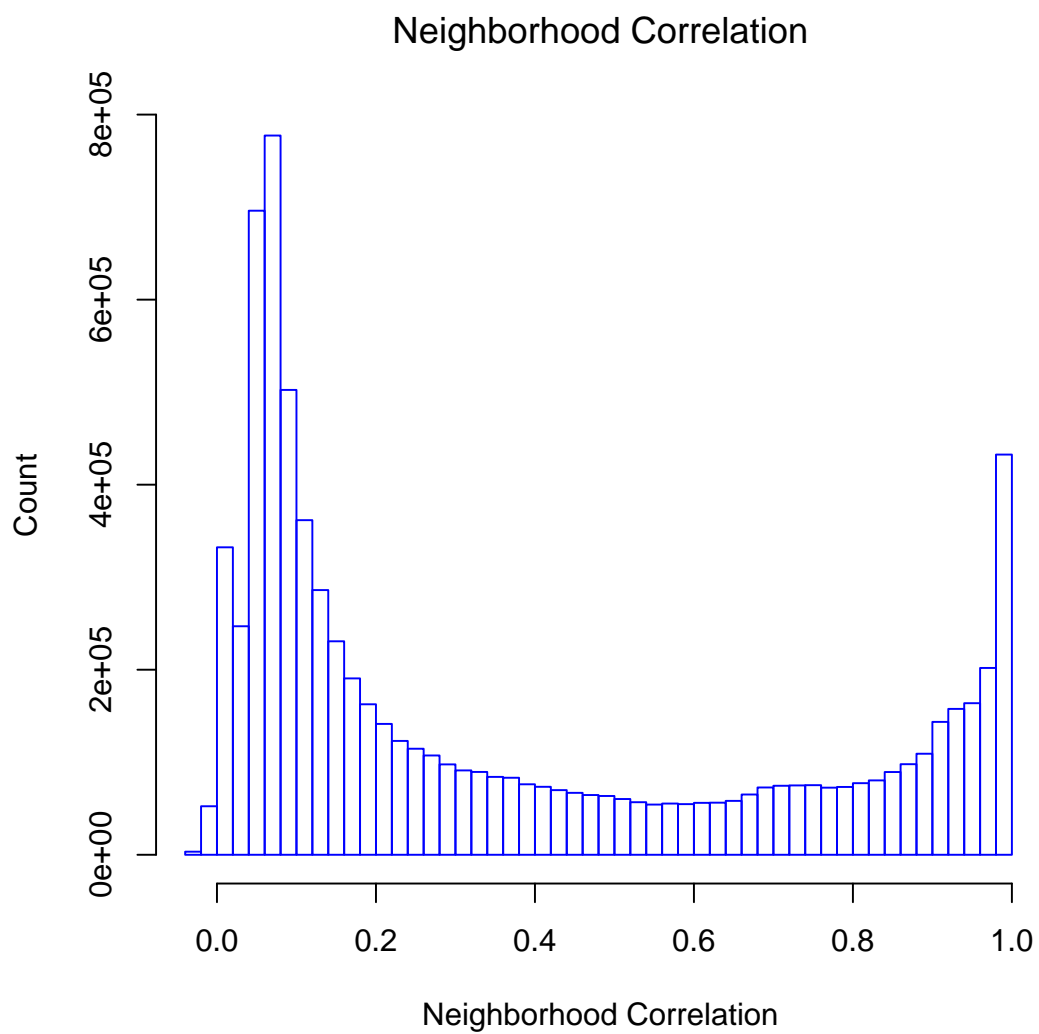

Figure S3: Distribution of NC scores for all sequence pairs.
